# Supplementary material for: Diagnostic accuracy of red blood cell distribution width to platelet ratio for predicting staging liver fibrosis in chronic liver disease patients: A systematic review and meta-analysis
Source: PubMed Central journal article supplement — Medicine (Baltimore). 2019 Apr 5;98(14):e15096. doi: 10.1097/MD.0000000000015096 (PMC6455720; doi:10.1097/md.0000000000015096), 2019-04-05
Supplement: medi-98-e15096-s001.pdf [file medi-98-e15096-s001.pdf]

A

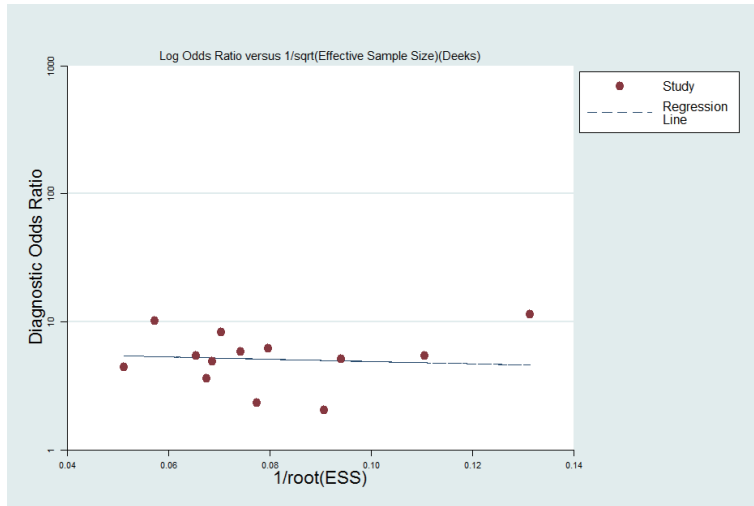

B

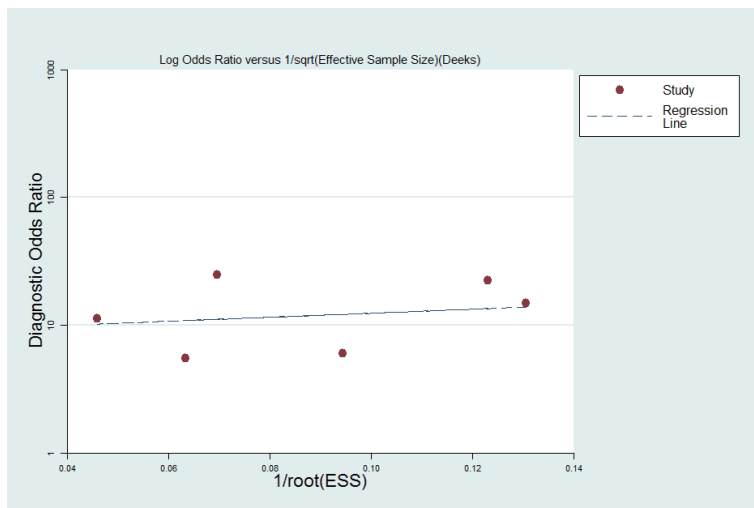

C

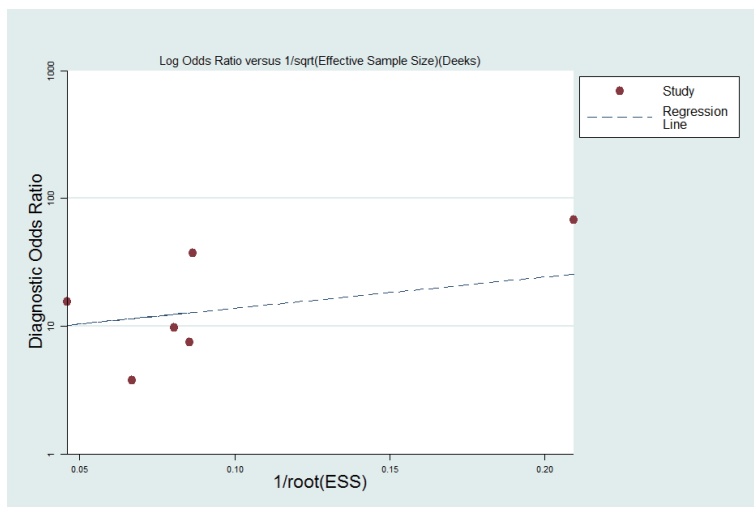

### Supplemental Digital Content

Supplemental Table 1. Summary sensitivity and specificity for RPR at various diagnostic thresholds for prediction of significant fibrosis.

| Cut-off values      | No. of Studies (Patients) | Sensitivity (95% CI) | Specificity (95% CI) | PLR (95% CI)        | NLR (95% CI)        | DOR (95% CI)         | AUC   |
|---------------------|---------------------------|----------------------|----------------------|---------------------|---------------------|----------------------|-------|
| <b>0.0625-0.075</b> | 5 (1187)                  | 0.66<br>(0.63-0.69)  | 0.75<br>(0.70-0.80)  | 2.21<br>(1.71-2.85) | 0.54<br>(0.44-0.69) | 4.33<br>(3.00-6.23)  | 0.721 |
| <b>0.0804-0.081</b> | 4 (1021)                  | 0.55<br>(0.51-0.60)  | 0.70<br>(0.66-0.74)  | 2.06<br>(1.63-2.60) | 0.56<br>(0.42-0.74) | 4.19<br>(2.76-6.36)  | 0.726 |
| <b>0.09</b>         | 2 (541)                   | 0.66<br>(0.58-0.74)  | 0.68<br>(0.64-0.73)  | 2.50<br>(1.18-5.31) | 0.46<br>(0.37-0.59) | 5.37<br>(2.36-12.21) | -     |
| <b>0.10</b>         | 1 (58)                    | 0.46                 | 0.92                 | -                   | -                   | -                    | 0.736 |
| <b>Unclear</b>      | 1 (310)                   | 0.63                 | 0.86                 | -                   | -                   | -                    | 0.825 |

AUC, area under the curve; CI: confidence interval; DOR, diagnostic odds ratio; NLR, negative likelihood ratio; No., number; PLR, positive likelihood ratio.

## Supplemental Digital Content

Supplemental Table 2. Results of meta-regression analysis

| <b>Variations</b>                        | <b>Coeff.</b> | <b>Std. Err.</b> | <b>P -value</b> | <b>RDOR [95%CI]</b> |
|------------------------------------------|---------------|------------------|-----------------|---------------------|
| <b>Significant fibrosis</b>              |               |                  |                 |                     |
| Aetiology (CHB vs. Others)               | -0.17         | 0.40             | 0.67            | 0.84 (0.35;2.03)    |
| Region (China vs. Others)                | 0.28          | 0.31             | 0.38            | 1.33 (0.67;2.64)    |
| Age (> Mean vs. < Mean)                  | 0.25          | 0.29             | 0.40            | 1.29 (0.68;2.46)    |
| Male% (> Mean vs. < Mean)                | -0.13         | 0.28             | 0.65            | 0.88 (0.47;1.63)    |
| Sample sizes (> Mean vs. < Mean)         | -0.03         | 0.30             | 0.93            | 0.97 (0.50;1.90)    |
| Scoring system                           | -0.06         | 0.12             | 0.64            | 0.94 (0.72;1.23)    |
| Length of LB ( $\geq 10$ mm vs. unclear) | 0.73          | 0.28             | 0.02            | 2.08 (1.12;3.85)    |
| ALT (> Mean vs. < Mean)                  | 0.18          | 0.32             | 0.58            | 1.20 (0.59;2.43)    |
| AST (> Mean vs. < Mean)                  | 0.17          | 0.33             | 0.62            | 1.18 (0.56;2.50)    |
| RDW (> Mean vs. < Mean)                  | 0.26          | 0.31             | 0.42            | 1.30 (0.65;2.61)    |
| PLT (> Mean vs. < Mean)                  | -0.08         | 0.33             | 0.81            | 0.92 (0.45;1.91)    |
| <b>Advanced fibrosis</b>                 |               |                  |                 |                     |
| Aetiology (CHB vs. Others)               | -1.30         | 0.99             | 0.28            | 0.27 (0.01;6.29)    |
| Region (China vs. Others)                | -0.84         | 0.35             | 0.10            | 0.43 (0.14;1.31)    |
| Age (> Mean vs. < Mean)                  | 0.54          | 0.69             | 0.48            | 1.72 (0.19;15.25)   |
| Male% (> Mean vs. < Mean)                | -0.54         | 0.69             | 0.48            | 0.58 (0.07;5.14)    |
| Sample sizes (> Mean vs. < Mean)         | -1.01         | 0.48             | 0.13            | 0.36 (0.08;1.67)    |
| Scoring system                           | 0.31          | 0.23             | 0.28            | 1.36 (0.66;2.79)    |
| Length of LB ( $\geq 10$ mm vs. unclear) | 0.54          | 0.69             | 0.49            | 1.72 (0.19;15.25)   |
| ALT (> Mean vs. < Mean)                  | 0.81          | 0.43             | 0.16            | 2.24 (0.57;8.82)    |
| AST (> Mean vs. < Mean)                  | 0.81          | 0.43             | 0.16            | 2.24 (0.57;8.82)    |
| RDW (> Mean vs. < Mean)                  | 0.54          | 0.69             | 0.49            | 1.72 (0.19;15.25)   |
| PLT (> Mean vs. < Mean)                  | 0.84          | 0.35             | 0.10            | 2.32 (0.76;7.05)    |
| <b>Cirrhosis</b>                         |               |                  |                 |                     |
| Aetiology (CHB vs. Others)               | -0.51         | 1.10             | 0.67            | 0.60 (0.02;19.63)   |
| Region (China vs. Others)                | -1.78         | 1.06             | 0.19            | 0.17 (0.01;4.89)    |
| Age (> Mean vs. < Mean)                  | 1.78          | 1.06             | 0.19            | 5.94 (0.20;172.75)  |
| Male% (> Mean vs. < Mean)                | -1.78         | 1.06             | 0.19            | 0.17 (0.01;4.89)    |
| Sample sizes (> Mean vs. < Mean)         | -0.17         | 0.97             | 0.87            | 0.84 (0.04;18.66)   |
| Scoring system                           | -0.24         | 1.42             | 0.87            | 0.78 (0.01;71.26)   |
| Length of LB (>10mm vs. unclear)         | 1.29          | 0.59             | 0.12            | 3.61 (0.56;23.34)   |
| RDW (> Mean vs. < Mean)                  | 1.01          | 0.74             | 0.26            | 2.76 (0.26;29.04)   |
| PLT (> Mean vs. < Mean)                  | 0.17          | 0.97             | 0.87            | 1.19 (0.05;26.45)   |

ALT, alanine aminotransferase; AST, aspartate aminotransferase; CHB, chronic hepatitis B; CI, confidence interval; Coeff. coefficient; LB, liver biopsy; PLT, platelet; RDOR relative diagnostic odds ratio; RDW, red cell distribution width; SE, standard error; vs. Versus.

## Supplemental Digital Content

Supplemental Table 3. Data of diagnostic accuracy of RPR, FIB-4 and APRI for the prediction of liver fibrosis in the same individuals of each stage.

| Study                       | RPR  |         |         |         | FIB-4 |         |         |         | APRI |         |         |         |
|-----------------------------|------|---------|---------|---------|-------|---------|---------|---------|------|---------|---------|---------|
|                             | AUC  | Cut-off | Sen (%) | Spe (%) | AUC   | Cut-off | Sen (%) | Spe (%) | AUC  | Cut-off | Sen (%) | Spe (%) |
| <b>Significant fibrosis</b> |      |         |         |         |       |         |         |         |      |         |         |         |
| Chen 2018                   | 0.64 | 0.081   | 39.2    | 90.0    | 0.72  | 0.997   | 57.5    | 83.3    | 0.72 | 0.669   | 57.5    | 78.3    |
| Koksal 2016                 | 0.68 | 0.07    | 56.0    | 21.0    | 0.68  | 1.45    | 51.0    | 86.0    | 0.73 | 0.50    | 67.0    | 69.0    |
| Lee 2016                    | 0.75 | 0.0625  | 72.3    | 67.7    | 0.78  | 1.025   | 75.4    | 73.8    | 0.72 | 0.415   | 80.8    | 49.2    |
| Li 2018                     | 0.74 | 0.10    | 45.5    | 91.7    | 0.71  | 1.45    | 59.1    | 80.6    | 0.70 | 0.50    | 31.8    | 86.1    |
| Wang 2016                   | 0.80 | 0.09    | 63.5    | 82.5    | 0.71  | 2.29    | 54.1    | 83.9    | 0.69 | 0.52    | 77.0    | 49.6    |
| Wu 2017                     | 0.64 | 0.09    | 70.7    | 60.4    | 0.68  | 1.45    | 58.5    | 70.2    | 0.72 | 0.52    | 80.8    | 52.8    |
| Zhu-1 2017                  | 0.71 | 0.0804  | 63.0    | 72.0    | 0.71  | 1.1951  | 69.0    | 66.0    | 0.66 | 0.4315  | 84.0    | 46.0    |
| Zhu-2 2017                  | 0.68 | 0.0804  | 53.0    | 67.0    | 0.65  | 1.1951  | 62.0    | 56.0    | 0.61 | 0.4315  | 71.0    | 43.0    |
| Zhu-3 2017                  | 0.78 | 0.0804  | 82.0    | 58.0    | 0.78  | 1.1951  | 74.0    | 61.0    | 0.75 | 0.4315  | 90.0    | 47.0    |
| <b>Advanced fibrosis</b>    |      |         |         |         |       |         |         |         |      |         |         |         |
| Huang 2017                  | 0.72 | 0.075   | 75.7    | 64.5    | 0.76  | 1.098   | 80.5    | 62.6    | 0.71 | 0.657   | 66.4    | 71.0    |
| Koksal 2016                 | 0.90 | 0.07    | 93.0    | 67.0    | 0.87  | 1.45    | 83.0    | 74.0    | 0.79 | 0.50    | 92.0    | 54.0    |
| Lee 2016                    | 0.80 | 0.0675  | 81.8    | 71.3    | 0.81  | 1.085   | 88.3    | 63.4    | 0.64 | 0.525   | 72.7    | 48.5    |
| Wu 2017                     | 0.71 | 0.098   | 73.1    | 67.5    | 0.73  | 1.15    | 95.7    | 53.1    | 0.80 | 0.69    | 86.4    | 66.9    |
| <b>Cirrhosis</b>            |      |         |         |         |       |         |         |         |      |         |         |         |
| Chen 2018                   | 0.79 | 0.0797  | 75.0    | 76.3    | 0.81  | 1.324   | 70.8    | 78.8    | 0.70 | 0.509   | 91.7    | 41.4    |
| Huang 2017                  | 0.74 | 0.096   | 60.2    | 78.6    | 0.76  | 1.341   | 83.1    | 60.7    | 0.69 | 0.78    | 65.1    | 67.6    |
| Lee 2016                    | 0.81 | 0.0685  | 66.0    | 67.6    | 0.80  | 1.415   | 80.6    | 67.9    | 0.68 | 0.795   | 58.5    | 67.9    |

APRI, Aspartate aminotransferase-platelet index; AUC, area under the curve; FIB-4, fibrosis index based on the four factors; RPR, red cell volume distribution width to platelet ratio; Sen, sensitivity; Spe, specificity.
